# Supplementary material
Source: publisher figshare collection journal article supplement (https://future-science-group.figshare.com/articles/dataset/_/23507019)
Supplement: Supplementary file 1 [file 1]

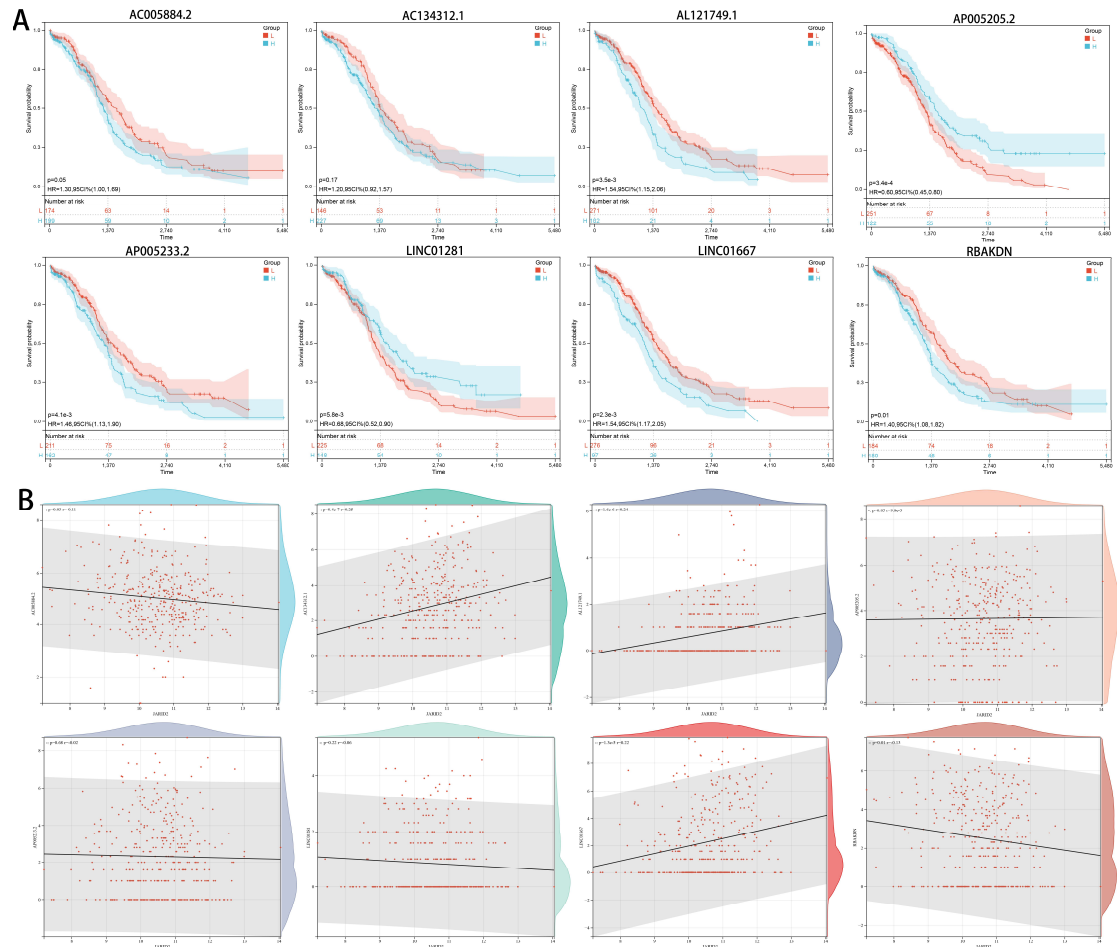

**Supplementary Figure 2.** Screening of lncRNAs closely related to JARID2. (A) Kaplan-Meier analysis of 8 lncRNAs. (B) Spearman analysis of the correlation between 8 lncRNAs and JARID2, which included 375 samples.
