# Supplementary material
Source: publisher figshare collection journal article supplement (https://future-science-group.figshare.com/articles/dataset/_/23507019)
Supplement: Supplementary file 2 [file 1]

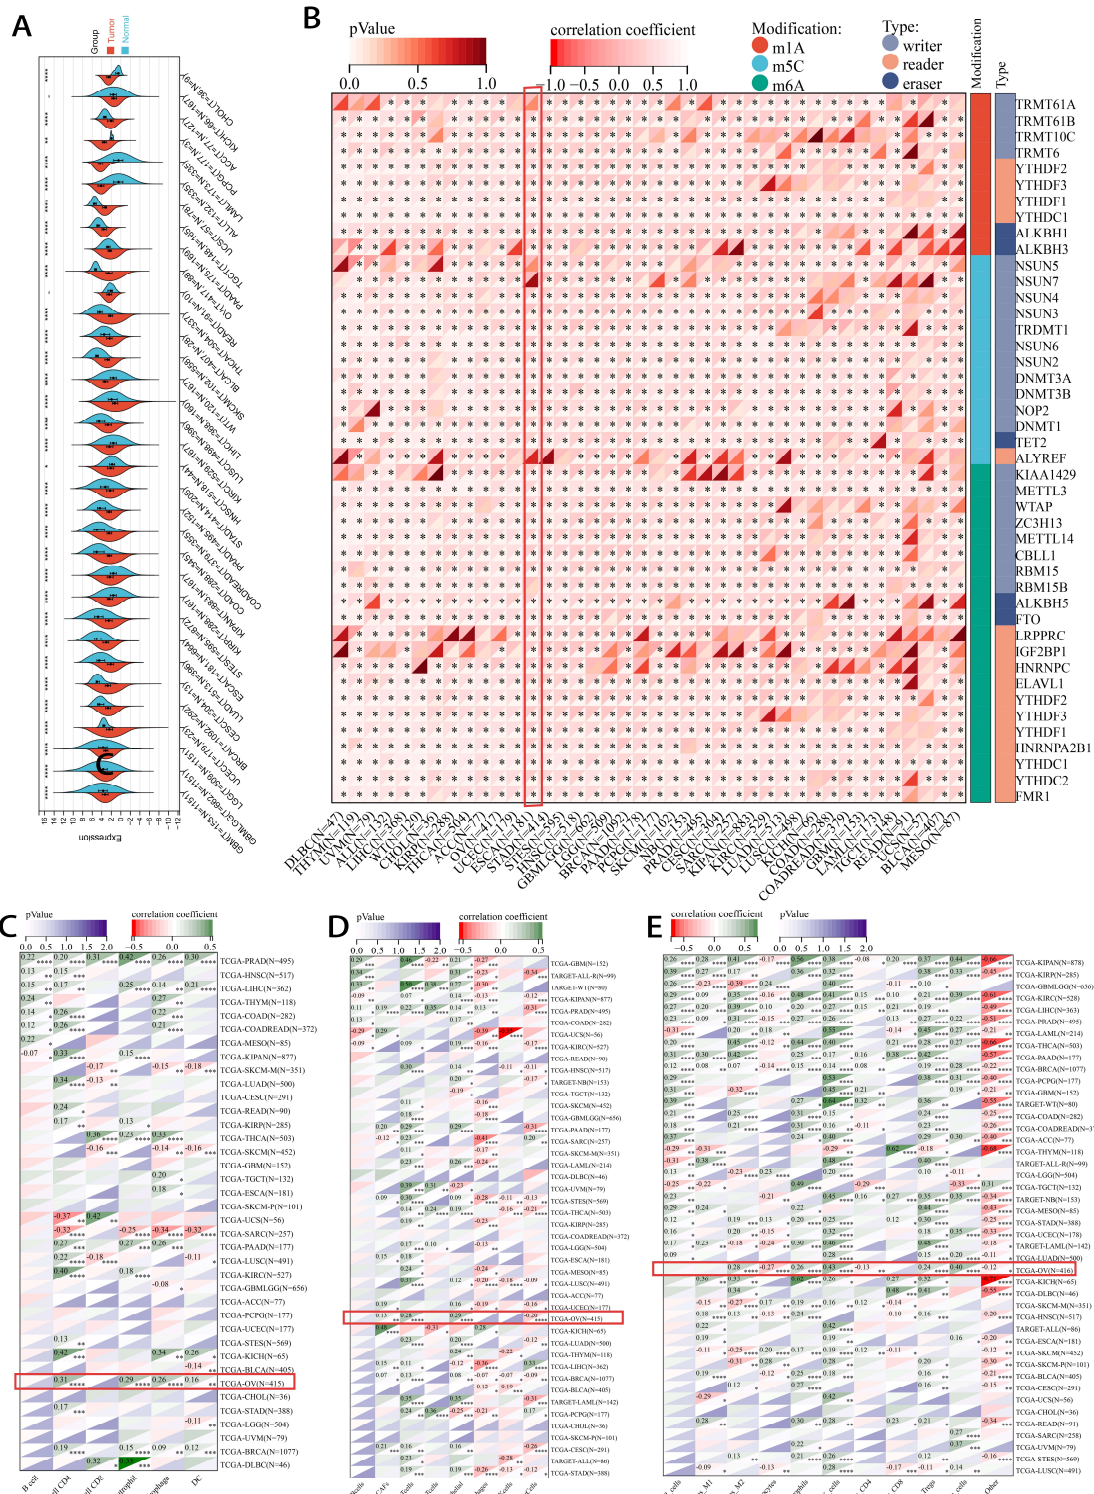

**Supplementary Figure 3. Pan-cancer analysis of PKD1P6. (A)** Pan-cancer differential analysis of PKD1P6 in TCGA+GTEX. **(B)** Association of PKD1P6 with RNA-modifying genes in pan-cancer. **(C–E)** Pan-cancer immune cell infiltration analysis of PKD1P6 in TCGA, EPIC and quantiseq databases.
