# Supplementary material
Source: publisher figshare collection journal article supplement (https://future-science-group.figshare.com/articles/dataset/_/23507019)
Supplement: Supplementary file 3 [file 1]

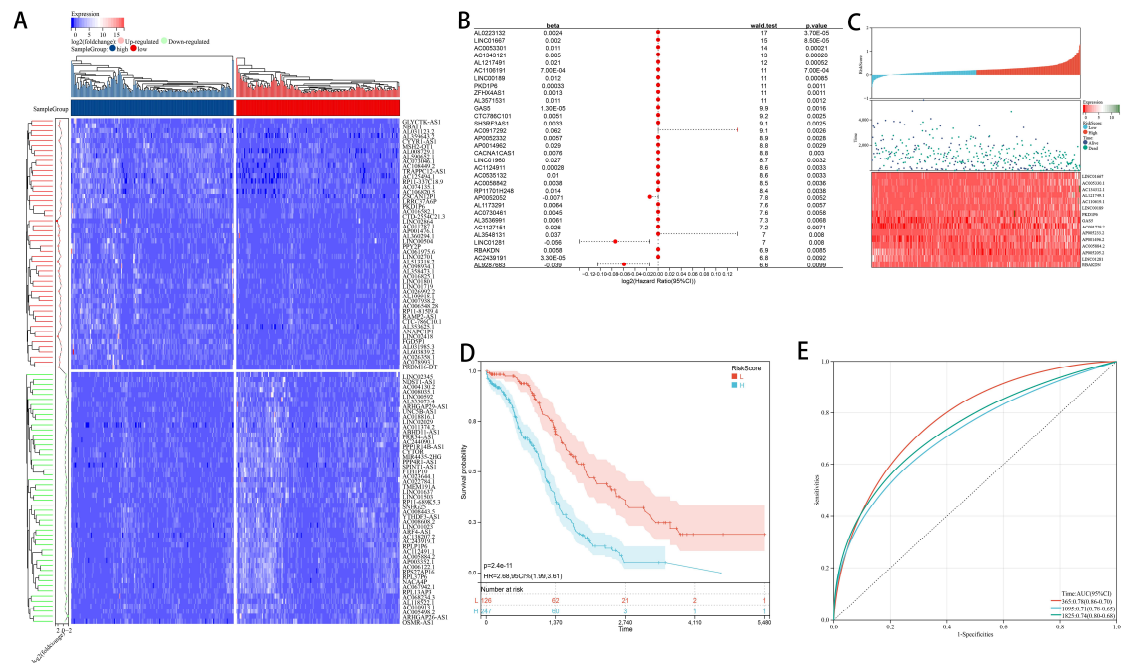

**Supplementary Figure 1.** Screening of DElncRNAs and establishment of a prognostic model. (A) Expression heatmap of the top 100 lncRNAs. (B) Univariate Cox analysis of DElncRNAs. (C) Relationship between risk score and survival time and status of OV patients. (D, E) Kaplan-Meier analysis and ROC curve test the diagnostic performance of new risk score.
